# Supplementary material
Source: Elsevier journal article supplement (https://www.sciencedirect.com/science/article/pii/S0301054617301775)
Supplement: mmc2 [file S0301054617301775:mmc2.pdf]

**Table S2.** The description of the questions used in a printed survey questionnaire for the parents of 1-year-old children.

**Basic information**

Child's name  
Sex  
Birth date  
Date  
Public health clinic, Postal code  
Birth weight and height  
Child's weight and height now

**Have you received information and instructions concerning introducing solid foods to child's diet?**

From Public Health Center  
From the Internet                      If yes, from which sites?  
From another source                  What source?

**Have you received information and instruction about allergies and rash of child?**

From Public Health Center  
From the Internet                      If yes, from which sites?  
From another source                  What source?

**How long was your child exclusively breastfed?**

Partially breastfed?

**Have the following foods been introduced to the diet of your child? If so, when (child's age as months)**

|                                 |           |
|---------------------------------|-----------|
| Cow's milk (including formulas) | Hen's egg |
| Wheat                           | Oats      |
| Barley                          | Rye       |
| Nut                             | Fish      |

**Did food cause symptoms?**

Which food caused the symptoms? What kind of symptoms and how long they lasted?

**Has some food been avoided in the diet of your child?**

If yes, describe the reason?

**Has your child any of the following conditions diagnosed by a physician**

|                                  |                                                               |
|----------------------------------|---------------------------------------------------------------|
| Atopic dermatitis                | not diagnosed, no more,    yes, periodically; yes, continuous |
| Allergic rhinitis (i.e. animals) | not diagnosed, yes                                            |
| Allergy to cow's milk            | not diagnosed; no more; yes                                   |
| Allergy to wheat of other cereal | not diagnosed; no more; yes                                   |
| Allergy to any other food        | not diagnosed; no more; yes                                   |
| Describe which foods             |                                                               |
| Other allergy, which?            |                                                               |

**Has your child been diagnosed with any other chronic diseases?**

If yes, describe which and when have these been diagnosed?

**Does your child use any medication regularly?**

If yes, describe?

**Has your child had following symptoms? Describe the characteristics and duration**

Urticaria  
Long-lasting rash  
Other skin symptom  
Mucosal symptoms in eyes, nose or mouth (itching, sting, redness, swelling, watering)  
Long-lasting diarrhea  
Other gastrointestinal symptoms  
Tearfulness  
Dyspnea

**How many common colds or other respiratory infections has your child experienced?**

**How many otitis media with antibiotics has your child ailed?**

Has your child had other illnesses treated with antibiotics?

**Has your child been examined in a hospital?**

If yes, why?

**Has your child ever been tested for allergy? Which tests?**

**Has your child ever used following medications?**

Antihistamine  
Adrenaline autoinjector  
Topical corticosteroids  
Moisturizers or emollients

**Have other family members been diagnosed with following diseases? (who: mother, father, siblings, none)**

Asthma  
Pollen or animal allergy  
Food allergy  
Atopic dermatitis
